# Supplementary material for: Interface-tuned selective reductive coupling of nitroarenes to aromatic azo and azoxy: a first-principles-based microkinetics study
Source: Royal Society of Chemistry journal article supplement (doi:10.1039/c9cp01795j), 2019-01-01
Supplement: c9cp01795j1.pdf [file c9cp01795j1.pdf]

## Electronic Supporting information

### **Interface-tuned Selective Reductive Coupling of Nitroarenes to Aromatic Azo and Azoxy: a First-principles-based Microkinetics Study**

Lidong Zhang <sup>a</sup>, Zheng-Jiang Shao, Xiao-Ming Cao <sup>a,\*</sup>, and P. Hu <sup>a,b,\*</sup>

*<sup>a</sup> Key Laboratory for Advanced Materials, Center for Computational Chemistry and  
Research Institute of Industrial Catalysis, East China University of Science and  
Technology, Shanghai 200237, P. R. China*

*<sup>b</sup> School of Chemistry and Chemical Engineering, The Queen's University of Belfast,  
Belfast, BT9 5AG, U. K.*

---

\* Corresponding Authors:

E-mail address: [xmcao@ecust.edu.cn](mailto:xmcao@ecust.edu.cn) (Xiao-Ming Cao) and [p.hu@qub.ac.uk](mailto:p.hu@qub.ac.uk) (P. Hu)

# Computational details:

## Modeling neutral conditions

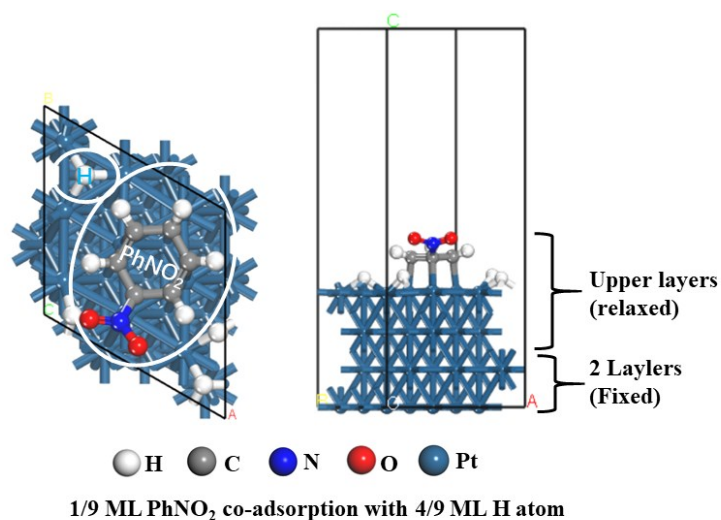

Fig. S1 The model of nitrobenzene hydrogenation under neutral conditions.

## Modeling KOH/Pt(111) interface

The most stable KOH/Pt(111) interface was taken as the model for the subsequent reaction simulation. Firstly, we tested the surface energies of a series of facets to identify the most stable exposed KOH facet. The calculated results were summarized in Table S1. The most stable (001) crystal plane was therefore chosen as the exposed surface.

Table S1 The surface energy ( $\gamma$ ) of KOH crystal plane

| <i>hkl</i>      | $\gamma$ (J/m <sup>2</sup> ) |
|-----------------|------------------------------|
| (001)           | 0.50                         |
| (100)           | 3.56                         |
| (10 $\bar{1}$ ) | 1.21                         |
| (011)           | 1.38                         |
| (110)           | 0.75                         |
| (11 $\bar{1}$ ) | 0.72                         |

Since different configurations of Pt/KOH interface would stem from the different

cutting orientations of KOH(001) on Pt(111). The adsorption energies per unit area  $E_{ad}$  ( $J/m^2$ ) of KOH(001) on Pt(111) for different configurations were further tested to evaluate the most stable configuration. The tested configurations and the calculated  $E_{ad}$  are illustrated in Figure R1 and the calculated results are listed in Table R3. The optimal configuration of (a) with the strongest adsorption energy per unit area was finally adopted as the model for the subsequent reaction simulation.

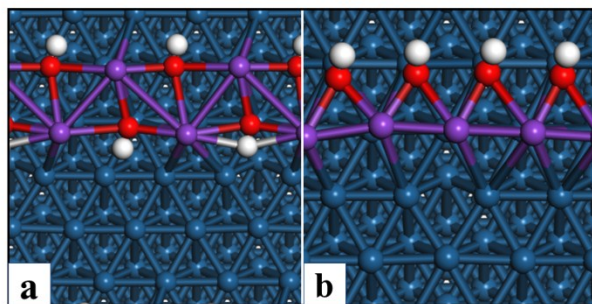

$$E_{ad} = -2.52 \text{ J/m}^2$$

$$E_{ad} = -1.14 \text{ J/m}^2$$

**Figure S2** The configurations (a) and (b) of KOH(001) on Pt(111) surface and the corresponding adsorption energy per unit area  $E_{ad}$  ( $J/m^2$ ) of KOH(001) plane on the Pt(111) surface

## Microkinetic data based on DFT calculation under neutral conditions

**Table S1.** The backward free energy of activation ( $G_a$ ) and free energy of reaction ( $\Delta G$ ) of each elementary step in the PhNO<sub>2</sub> hydrogenation under the neutral reaction condition.

| Step | Reactions                              | $G_a$ (eV) | $\Delta G$ (eV) |
|------|----------------------------------------|------------|-----------------|
| 1    | PhNO <sub>2</sub> *+H* → PhNOOH*       | 0.28       | 0.23            |
|      | (1a → TS(1a/1b) → 1b)                  |            |                 |
| 2    | PhNO <sub>2</sub> * → PhNO* + O*       | 0.68       | -1.53           |
|      | (1a → TS(1a/1l) → 1l)                  |            |                 |
| 3    | PhNOOH*+H* → PhN(OH) <sub>2</sub> *    | 0.20       | 0.09            |
|      | (1b → TS(1b/1c) → 1c)                  |            |                 |
| 4    | PhNOOH* → PhNO* + OH*                  | 0.62       | -0.09           |
|      | 1b → TS(1b/1d) → 1d                    |            |                 |
| 5    | PhNO* → PhN* + O*                      | 1.40       | -0.57           |
|      | (1f → TS(1f/1m) → 1m)                  |            |                 |
| 6    | PhN*+H* → PhNH*                        | 1.47       | 0.93            |
|      | (1n → TS(1n/1j) → 1j)                  |            |                 |
| 7    | PhN(OH) <sub>2</sub> * → PhNOH* + OH*  | 0.73       | 0.02            |
|      | (1c → TS(1c/1e) → 1e)                  |            |                 |
| 8    | H* + OH* → H <sub>2</sub> O(g) (PhNO)  | 1.09       | 0.92            |
|      | (1d → TS(1d/1f) → 1f)                  |            |                 |
| 9    | PhNO* + H* → PhNOH*                    | 0.47       | 0.35            |
|      | (1f → TS(1f/1g) → 1g)                  |            |                 |
| 10   | PhNO* + H* → PhNHO*                    | 0.89       | 0.44            |
|      | (1f → TS(1f/1o) → 1o)                  |            |                 |
| 11   | H* + OH* → H <sub>2</sub> O(g) (PhNOH) | 1.08       | 0.88            |
|      | (1e → TS(1e/1g) → 1g)                  |            |                 |
| 12   | PhNOH* + H* → PhNHOH*                  | 0.98       | 0.63            |
|      | (1g → TS(1g/1h) → 1h)                  |            |                 |
| 13   | PhNHO* + H* → PhNHOH*                  | 0.57       | 0.54            |
|      | (1o → TS(1o/1h) → 1h)                  |            |                 |
| 14   | PhNHOH* → PhNH* + OH*                  | 1.19       | 0.33            |
|      | (1h → TS(1h/1i) → 1i)                  |            |                 |
| 15   | H* + OH* → H <sub>2</sub> O(g) (PhNH)  | 1.24       | 1.10            |
|      | (1i → TS(1i/1j) → 1j)                  |            |                 |
| 16   | PhNH* + H* → PhNH <sub>2</sub> *       | 0.87       | 0.79            |
|      | (1j → TS(1j/1k) → 1k)                  |            |                 |
| 17   | PhNOH* → PhN* + OH*                    | 0.28       | -1.64           |

| (1g → TS(1g/1l) → 1l) |                                                                         |      |       |
|-----------------------|-------------------------------------------------------------------------|------|-------|
| 18                    | $\text{PhNO}^* + \text{PhNO}^* \rightarrow \text{PhN(O)N(O)Ph}^*$       | 0.92 | -0.26 |
| 19                    | $\text{PhN(O)N(O)Ph}^* + \text{H}^* \rightarrow \text{PhN(OH)N(O)Ph}^*$ | 0.15 | -0.11 |
| 20                    | $\text{PhN(OH)N(O)Ph}^* \rightarrow \text{PhNN(O)Ph}^* + \text{OH}^*$   | 2.49 | 1.43  |
| 21                    | $\text{PhNOH}^* + \text{PhNOH}^* \rightarrow \text{PhN(OH)N(OH)Ph}^*$   | 0.76 | -0.57 |
| 22                    | $\text{PhN(OH)N(OH)Ph}^* \rightarrow \text{PhN(OH)NPh}^* + \text{OH}^*$ | 1.33 | 0.63  |
| 23                    | $\text{PhN(OH)NPh}^* + * \rightarrow \text{PhN(O)NPh}^* + \text{H}^*$   | 0.12 | -0.01 |
| 24                    | $\text{PhN(OH)NPh}^* + * \rightarrow \text{PhNNPh}^* + \text{OH}^*$     | 1.07 | 0.17  |
| 24                    | $\text{PhNOH}^* + \text{PhNO}^* \rightarrow \text{PhN(OH)N(O)Ph}^*$     | 0.90 | -0.78 |

---

**Table S2.** The forward rate  $r_+$ , reverse rate  $r_-$ , net rate  $r_i$ , imaginary vibrational frequency value of TS ( $f/i$ ), reversibility  $Z_i$  and sensitive degree of rate control  $X_{RC,i}^*$  of each step during PhNO<sub>2</sub> hydrogenation over Pt(111) under the neutral conditions.

| Step | $r_+$ (s <sup>-1</sup> )                                           | $r_-$ (s <sup>-1</sup> ) | $r_i$ (s <sup>-1</sup> ) | $Z_i$     | $X_{RC,i}$ |              | $f/i$ (cm <sup>-1</sup> ) |        |
|------|--------------------------------------------------------------------|--------------------------|--------------------------|-----------|------------|--------------|---------------------------|--------|
|      |                                                                    |                          |                          |           | direct     | condensation |                           |        |
| R1   | PhNO <sub>2</sub> (g) + * $\rightleftharpoons$ PhNO <sub>2</sub> * | 2.49E-03                 | 6.64E-19                 | 2.49E-03  | 2.67E-16   | 0.00         | 0.02                      | -      |
| R2   | H <sub>2</sub> (g) + 2* $\rightleftharpoons$ 2H*                   | 1.25E+04                 | 1.25E+04                 | 7.47E-03  | 1.00E+00   | 0.00         | 0.00                      | -      |
| R3   | PhNO <sub>2</sub> * + H* $\rightleftharpoons$ PhNOOH* + *          | 2.64E-03                 | 1.47E-04                 | 2.49E-03  | 5.58E-02   | 0.00         | 0.00                      | 280.44 |
| R4   | PhNOOH* + H* $\rightleftharpoons$ PhN(OH) <sub>2</sub> * + *       | 2.47E+00                 | 2.47E+00                 | 2.49E-03  | 9.99E-01   | 0.00         | 0.00                      | 166.78 |
| R5   | PhNOOH* + * $\rightleftharpoons$ PhNO* + OH*                       | 2.07E-09                 | 4.10E-23                 | 2.07E-09  | 1.98E-14   | 0.00         | 0.00                      | 168.6  |
| R6   | PhN(OH) <sub>2</sub> * + * $\rightleftharpoons$ PhNOH* + OH*       | 2.49E-03                 | 1.26E-17                 | 2.49E-03  | 5.07E-15   | 0.00         | 0.00                      | 322.8  |
| R7   | H* + OH* $\rightleftharpoons$ H <sub>2</sub> O* + *                | 4.98E-03                 | 1.44E-17                 | 4.98E-03  | 2.88E-15   | 0.00         | 0.00                      | 287.26 |
| R8   | PhNO* + H* $\rightleftharpoons$ PhNOH* + *                         | 4.18E-08                 | 3.98E-08                 | 2.07E-09  | 9.51E-01   | 0.00         | 0.00                      | 245.57 |
| R9   | PhNO* + H* $\rightleftharpoons$ PhNHO* + *                         | 4.24E-14                 | 1.50E-13                 | -1.08E-13 | 3.54E+00   | 0.00         | -                         | 531.31 |
| R10  | PhNOH* + H* $\rightleftharpoons$ PhNHOH* + *                       | 3.44E+00                 | 3.43E+00                 | 2.49E-03  | 9.99E-01   | 0.00         | -                         | 461.36 |
| R11  | PhNHO* + H* $\rightleftharpoons$ PhNHOH* + *                       | 4.72E+04                 | 4.72E+04                 | -1.08E-13 | 1.00E+00   | 0.00         | -                         | 153.64 |
| R12  | PhNHOH* + * $\rightleftharpoons$ PhNH* + OH*                       | 2.49E-03                 | 4.82E-28                 | 2.49E-03  | 1.94E-25   | 1.00         | -                         | 181.21 |
| R13  | PhNH* + H* $\rightleftharpoons$ PhNH <sub>2</sub> * + *            | 2.49E-03                 | 6.15E-11                 | 2.49E-03  | 2.47E-08   | 0.00         | -                         | 144.42 |
| R14  | H <sub>2</sub> O* $\rightleftharpoons$ H <sub>2</sub> O + *        | 4.99E-03                 | 9.48E-06                 | 4.98E-03  | 1.90E-03   | 0.00         | -                         | -      |
| R15  | PhNH <sub>2</sub> * $\rightleftharpoons$ PhNH <sub>2</sub> + *     | 5.37E+01                 | 5.37E+01                 | 2.49E-03  | 1.00E+00   | 0.00         | -                         | -      |
| R16  | PhNO* + PhNO* $\rightleftharpoons$ PhN(O)N(O)Ph* + *               | 1.60E-35                 | 1.09E-35                 | 5.01E-36  | 6.86E-01   | -            | 0.00                      | 198.99 |
| R17  | PhN(O)N(O)Ph* + H* $\rightleftharpoons$ PhN(O)N(OH)Ph* + *         | 4.86E-23                 | 4.86E-23                 | 5.01E-36  | 1.00E+00   | -            | 0.00                      | 397.3  |
| R18  | PhN(O)N(OH)Ph* + * $\rightleftharpoons$ PhN(O)NPh* + OH*           | 5.01E-36                 | 2.25E-63                 | 5.01E-36  | 4.49E-28   | -            | 0.00                      | 462.42 |
| R19  | PhNOH* + PhNOH* $\rightleftharpoons$ PhN(OH)N(OH)Ph* + *           | 5.48E-28                 | 2.50E-36                 | 5.48E-28  | 4.56E-09   | -            | 0.96                      | 308.29 |
| R20  | PhN(OH)N(OH)Ph* + * $\rightleftharpoons$ PhN(OH)NPh + OH*          | 5.48E-28                 | 1.17E-42                 | 5.48E-28  | 2.14E-15   | -            | 0.02                      | 188.34 |
| R21  | PhN(OH)NPh* + * $\rightleftharpoons$ PhN(O)NPh* + H*               | 3.81E-17                 | 3.81E-17                 | -4.93E-36 | 1.00E+00   | -            | 0.00                      | 311.67 |
| R22  | PhN(OH)NPh* + * $\rightleftharpoons$ PhNNPh* + OH*                 | 2.02E-27                 | 1.47E-27                 | 5.48E-28  | 7.29E-01   | -            | 0.00                      | 328.44 |
| R23  | PhNO* + PhNOH* $\rightleftharpoons$ PhN(O)N(OH)Ph* + *             | 3.03E-41                 | 3.15E-41                 | -1.24E-42 | 1.04E+00   | -            | 0.00                      | 282.79 |
| R24  | PhN(O)NPh* $\rightleftharpoons$ PhN(O)NPh + *                      | 7.86E-38                 | 0.00E+00                 | 7.86E-38  | 0.00E+00   | -            | 0.00                      | -      |
| R25  | PhNNPh* $\rightleftharpoons$ PhNNPh + *                            | 5.48E-28                 | 0.00E+00                 | 5.48E-28  | 0.00E+00   | -            | 0.00                      | -      |
| R26  | PhNHOH* $\rightleftharpoons$ PhNHOH + *                            | 1.22E-23                 | 0.00E+00                 | 1.22E-23  | 0.00E+00   | 0.00         | -                         | -      |
| R27  | PhNO* $\rightleftharpoons$ PhNO + *                                | 9.07E-48                 | 0.00E+00                 | 9.07E-48  | 0.00E+00   | 0.00         | -                         | -      |

\* The microkinetic simulation of the reaction rate for each step and the coverage of each intermediate were based on the whole reaction network. However, to understand the importance

of each step for either direct route or condensation route,  $X_{RC,i}^*$  were calculated separately at direct and condensation routes without considering the interaction between two routes throughout the work.

**Table S3.** The coverage ( $\theta(j)$ ) and the degree of thermodynamic rate control ( $X_{TRC, j}$ ) of major intermediates  $j$  on Pt(111) under the neutral condition.

| Species                | $\theta(j)$ | $X_{TRC, j}$ |
|------------------------|-------------|--------------|
| H*                     | 3.65E-01    | -0.45        |
| PhNO <sub>2</sub> *    | 1.09E-13    | 0.00         |
| PhNOOH*                | 5.33E-12    | 0.00         |
| PhN(OH) <sub>2</sub> * | 8.89E-05    | 0.00         |
| PhNO*                  | 2.41E-19    | 0.00         |
| OH*                    | 4.94E-13    | 0.00         |
| H <sub>2</sub> O*      | 1.68E-11    | 0.00         |
| PhNOH*                 | 1.42E-09    | 0.00         |
| PhNHO*                 | 1.41E-07    | 0.00         |
| PhNHOH*                | 6.34E-01    | -0.78        |
| PhNH*                  | 9.22E-14    | 0.00         |
| PhNH <sub>2</sub> *    | 3.01E-06    | 0.00         |
| PhN(OH)N(OH)Ph*        | 1.45E-32    | 0.00         |
| PhN(OH)NPh*            | 5.76E-49    | 0.00         |
| PhN(O)N(OH)Ph*         | 9.57E-39    | 0.00         |
| PhN(O)N(O)Ph*          | 9.32E-43    | 0.00         |
| PhN(O)NPh*             | 1.52E-56    | 0.00         |
| PhNNPh*                | 7.88E-58    | 0.00         |
| *                      | 4.18E-04    | 0.00         |



## Microkinetic data based on DFT calculation at KOH/Pt(111) interface

**Table S4.** The backward free energy of activation ( $G_a$ ) and free energy of reaction ( $\Delta G$ ) of each elementary step in PhNO<sub>2</sub> hydrogenation under the alkaline conditions.

| Step | Reactions                                                 | $G_a$ (eV) | $\Delta G$ (eV) |
|------|-----------------------------------------------------------|------------|-----------------|
| 1    | PhNO <sub>2</sub> * → PhNO* + O*<br>(2a → TS(2a/2k) → 2k) | 1.23       | 0.29            |
| 2    | PhNO <sub>2</sub> *+H* → PhNOOH*<br>(2a → TS(2a/2b) → 2b) | 0.23       | -0.13           |
| 3    | PhNOOH*→PhNO*+OH*<br>(2b → TS(2b/2c) → 2c)                | 1.10       | 1.06            |
| 4    | PhNO*→PhN*+O*<br>(2c → TS(2c/2l) → 2l)                    | 0.59       | -0.30           |
| 5    | PhN*+H*→PhNH*<br>(2g → TS(2g/2i) → 2i)                    | 0.99       | -0.28           |
| 6    | PhNO*+H*→PhNOH*<br>(2c → TS(2c/2e) → 2e)                  | 0.34       | -0.37           |
| 7    | PhNO*+H*→PhNHO*<br>(2c → TS(2c/2d) → 2d)                  | 1.11       | 0.05            |
| 8    | PhNOH*+H*→PhNHOH*<br>(2e → TS(2e/2f) → 2f)                | 1.35       | 0.36            |
| 9    | PhNHO*+H*→PhNHOH*<br>(2d → TS(2d/2f) → 2f)                | 0.67       | 0.08            |
| 10   | PhNHOH*→PhNH*+OH*<br>(2f → TS(2f/2h) → 2h)                | 1.71       | 0.99            |
| 11   | PhNH*+H*→PhNH <sub>2</sub> *<br>(2i → TS(2i/2j) → 2j)     | 1.47       | 0.55            |
| 12   | PhNOH* → PhN* + OH*<br>(2e → TS(2e/2g) → 2g)              | 1.49       | 1.24            |
| 13   | PhNHO* → PhNH* + O*<br>(2d → TS(2d/2m) → 2m)              | 0.56       | -0.12           |
| 14   | O* + H* → OH*                                             | 1.63       | 1.08            |
| 15   | H* + OH* → H <sub>2</sub> O                               | 0.89       | 0.76            |
| 16   | PhNO*+PhNOH*→PhN(O)N(OH)Ph*                               | 0.44       | -0.79           |
| 17   | PhNO*+PhN*→PhNN(O)Ph*                                     | 1.12       | 0.38            |
| 18   | PhNO*+PhNO* →PhN(O)N(O)Ph*                                | 0.06       | -1.36           |
| 19   | PhNOH*+PhNOH* →PhN(OH)N(OH)Ph*                            | 0.74       | 0.17            |
| 20   | PhNOH*+PhN* →PhN(OH)NPh*                                  | 1.17       | 0.38            |

|    |                                                                             |      |       |
|----|-----------------------------------------------------------------------------|------|-------|
| 21 | $\text{PhN}^* + \text{PhN}^* \rightarrow \text{PhNNPh}^*$                   | 1.57 | -0.04 |
| 22 | $\text{PhN(OH)N(OH)Ph}^* + * \rightarrow \text{PhN(OH)NPh}^* + \text{OH}^*$ | 1.49 | 0.83  |
| 23 | $\text{PhN(O)NPh}^* + \text{H}^* \rightarrow \text{PhN(OH)NPh}^*$           | 0.62 | -0.13 |
| 24 | $\text{PhN(OH)NPh}^* \rightarrow \text{PhNNPh}^* + \text{OH}^*$             | 1.52 | 1.14  |
| 25 | $\text{PhN(O)NPh}^* \rightarrow \text{PhNNPh}^* + \text{O}^*$               | 1.07 | 0.06  |

---

**Table S5.** The forward rate  $r_+$ , reverse rate  $r_-$ , net rate  $r_i$ , imaginary vibrational frequency value of TS ( $f/i$ ), reversibility  $Z_i$  and sensitive degree of rate control  $X_{RC,i}^*$  of each step for PhNO<sub>2</sub> hydrogenation at KOH/Pt(111) interface.

| Step | $r_+$ (s <sup>-1</sup> )                                    | $r_-$ (s <sup>-1</sup> ) | $r_i$ (s <sup>-1</sup> ) | $Z_i$    | $X_{RC,i}^*$ |                  | $f/i(\text{cm}^{-1})$ |
|------|-------------------------------------------------------------|--------------------------|--------------------------|----------|--------------|------------------|-----------------------|
|      |                                                             |                          |                          |          | direct       | condensatio<br>n |                       |
| R1   | PhNO <sub>2</sub> (g) + * ⇌ PhNO <sub>2</sub> *<br>2.78E-03 | 3.93E-16                 | 2.78E-03                 | 1.41E-13 | 0.00         | 0.00             | -                     |
| R2   | H <sub>2</sub> (g) + 2* ⇌ 2H*<br>1.31E-01                   | 1.27E-01                 | 4.51E-03                 | 9.66E-01 | 0.00         | 0.00             | -                     |
| R3   | PhNO <sub>2</sub> * + H* ⇌ PhNOOH* + *<br>1.05E-06          | 2.78E-03                 | 2.78E-03                 | 2.66E+03 | 0.00         | 0.00             | 685.08                |
| R4   | PhNOOH* + * ⇌ PhNO* + *<br>OH*<br>2.78E-03                  | 1.76E-19                 | 2.78E-03                 | 6.33E-17 | 0.00         | 0.00             | 237.84                |
| R5   | PhNO <sub>2</sub> * + * ⇌ PhNO* + O*<br>2.30E-07            | 2.67E-13                 | 2.30E-07                 | 1.16E-06 | 0.00         | 0.00             | 434.28                |
| R6   | H* + OH* ⇌ H <sub>2</sub> O* + *<br>4.51E-03                | 2.60E-14                 | 4.51E-03                 | 5.77E-12 | 0.00         | 0.00             | 333.63                |
| R7   | PhNO* + * ⇌ PhN* + O*<br>1.19E-10                           | 9.45E-08                 | -9.44E-08                | 7.96E+02 | 0.00         | 0.00             | 370.77                |
| R8   | PhNO* + H* ⇌ PhNOH* + *<br>1.43E-03                         | 3.75E-05                 | 1.39E-03                 | 2.62E-02 | 0.00         | 0.00             | 999.21                |
| R9   | PhNO* + H* ⇌ PhNHO* + *<br>1.45E-08                         | 4.12E-18                 | 1.45E-08                 | 2.85E-10 | 0.00         | 0.00             | 889.9                 |
| R10  | PhNOH* + H* ⇌ PhNHOH* + *<br>*<br>4.65E-10                  | 3.53E-15                 | 4.65E-10                 | 7.60E-06 | 0.00         | -                | 607.77                |
| R11  | PhNHO* + H* ⇌ PhNHOH* + *<br>*<br>6.84E-07                  | 6.69E-07                 | 1.45E-08                 | 9.79E-01 | 0.00         | -                | 424.85                |
| R12  | PhNHOH* + * ⇌ PhNH* + *<br>OH*<br>1.50E-08                  | 1.95E-29                 | 1.50E-08                 | 1.30E-21 | 0.00         | -                | 453.42                |
| R13  | PhNOH* + * ⇌ PhN* + OH*<br>1.39E-03                         | 1.71E-23                 | 1.39E-03                 | 1.23E-20 | 0.00         | 0.00             | 298.51                |
| R14  | PhN* + H* ⇌ PhNH* + *<br>7.22E-08                           | 1.80E-14                 | 7.22E-08                 | 2.50E-07 | 1.00         | -                | 698.97                |
| R15  | PhNH* + H* ⇌ PhNH <sub>2</sub> * + *<br>8.71E-08            | 2.99E-28                 | 8.71E-08                 | 3.43E-21 | 0.00         | -                | 949.42                |
| R16  | H <sub>2</sub> O* ⇌ H <sub>2</sub> O + *<br>5.51E+01        | 5.50E+01                 | 4.51E-03                 | 1.00E+00 | 0.00         | 0.00             | -                     |
| R17  | PhNH <sub>2</sub> * ⇌ PhNH <sub>2</sub> + *<br>8.71E-08     | 0.00E+00                 | 8.71E-08                 | 0.00E+00 | 0.00         | -                | -                     |
| R18  | PhNO* + PhN* ⇌ PhN(O)NPh*<br>+ *<br>1.39E-03                | 1.07E-08                 | 1.39E-03                 | 7.72E-06 | -            | 1.00             | 119.66                |
| R19  | PhNOH* + PhNOH* ⇌<br>PhN(OH)N(OH)Ph* + *<br>2.90E-10        | 2.90E-10                 | 1.99E-14                 | 1.00E+00 | -            | 0.00             | 277.19                |
| R20  | PhNOH* + PhN* ⇌<br>PhN(OH)NPh* + *<br>1.20E-06              | 3.56E-10                 | 1.20E-06                 | 2.96E-04 | -            | 0.00             | 197.28                |
| R21  | PhN* + PhN* ⇌ PhNNPh* + *<br>1.37E-11                       | 2.44E-14                 | 1.36E-11                 | 1.79E-03 | -            | 0.00             | 373.03                |
| R22  | PhN(OH)N(OH)Ph* + * ⇌<br>PhN(OH)NPh* + OH*<br>1.99E-14      | 9.79E-27                 | 1.99E-14                 | 4.93E-13 | -            | 0.00             | 247.19                |
| R23  | PhN(O)NPh* + H* ⇌<br>PhN(OH)NPh* + *<br>3.30E-04            | 1.24E-07                 | 3.29E-04                 | 3.77E-04 | -            | 0.00             | 165.09                |
| R24  | PhN(OH)NPh* + * ⇌ PhNNPh* + *<br>+ OH*<br>3.31E-04          | 1.28E-25                 | 3.31E-04                 | 3.87E-22 | -            | 0.00             | 343.23                |
| R25  | PhN(O)NPh* + * ⇌ PhNNPh* + *<br>O*<br>1.97E-12              | 2.68E-18                 | 1.97E-12                 | 1.36E-06 | -            | 0.00             | 335.46                |
| R26  | O* + H* ⇌ OH*<br>1.35E-07                                   | 2.02E-28                 | 1.35E-07                 | 1.50E-21 | 0.00         | 0.00             | 708.01                |

|     |                      |                          |          |          |          |          |   |      |   |
|-----|----------------------|--------------------------|----------|----------|----------|----------|---|------|---|
|     |                      | PhN(O)NPh* ⇌ PhN(O)NPh + |          |          |          |          |   |      |   |
| R27 | *                    |                          | 1.06E-03 | 1.10E-09 | 1.06E-03 | 1.04E-06 | - | 0.00 | - |
| R28 | PhNNPh* ⇌ PhNNPh + * |                          | 3.31E-04 | 0.00E+00 | 3.31E-04 | 0.00E+00 | - | 0.00 | - |

---

**Table S6.** The coverage ( $\theta(j)$ ) and the degree of thermodynamic rate control ( $X_{TRC, j}$ ) of major intermediates  $j$  at KOH/Pt(111) interface.

| Species             | $\theta(j)$ | $X_{TRC, j}$ |
|---------------------|-------------|--------------|
| H*                  | 1.61E-01    | -0.48        |
| PhNO <sub>2</sub> * | 3.34E-09    | 0.00         |
| PhNOOH*             | 5.69E-10    | 0.00         |
| PhNO*               | 3.28E-05    | 0.00         |
| O*                  | 8.06E-12    | 0.00         |
| OH*                 | 1.02E-12    | 0.00         |
| H <sub>2</sub> O*   | 1.85E-07    | 0.00         |
| PhNOH*              | 1.47E-07    | 0.00         |
| PhN*                | 8.39E-01    | -2.52        |
| PhNH*               | 1.98E-06    | 0.00         |
| PhNH <sub>2</sub> * | 1.68E-14    | 0.00         |
| PhNHO*              | 9.95E-11    | 0.00         |
| PhNHOH*             | 1.11E-05    | 0.00         |
| PhN(OH)N(OH)Ph*     | 5.73E-12    | 0.00         |
| PhN(OH)NPh*         | 9.62E-06    | 0.00         |
| PhNNPh*             | 3.37E-04    | 0.00         |
| PhN(O)NPh*          | 5.62E-05    | 0.00         |
| *                   | 4.03E-06    | 0.00         |
